# Supplementary material
Source: Springer Nature journal article supplement (https://www.springermedizin.de/resource/supplementary/12885_2005_292_MOESM4_ESM.pdf/9469128)

## GIRK1

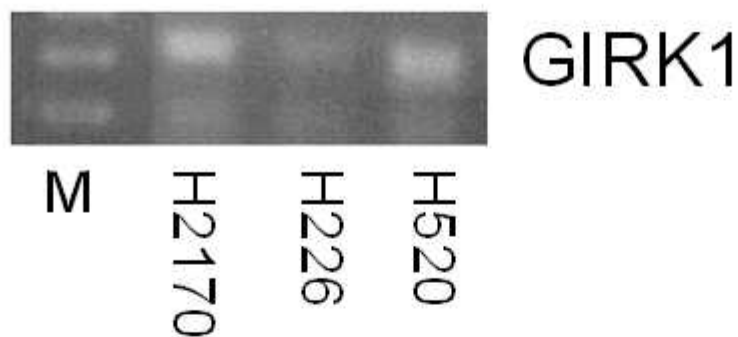

## GIRK2 & GIRK4

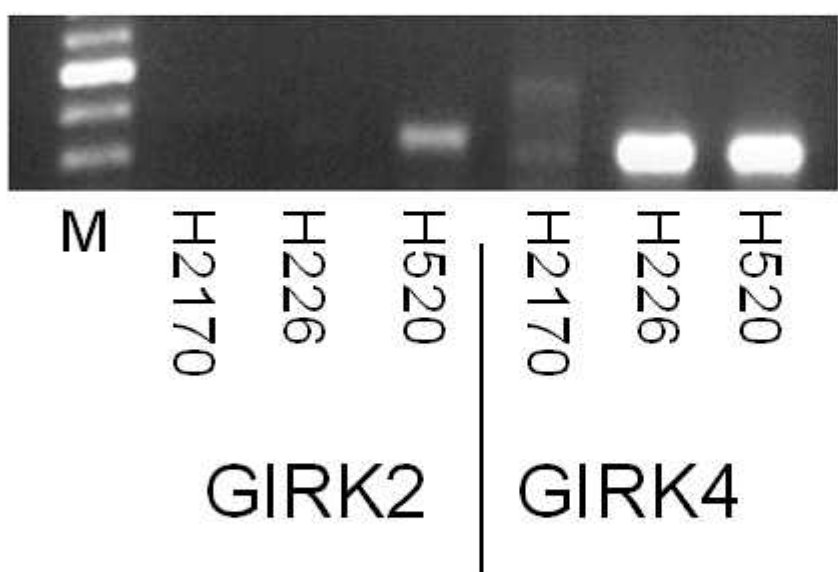

## Cyclophilin

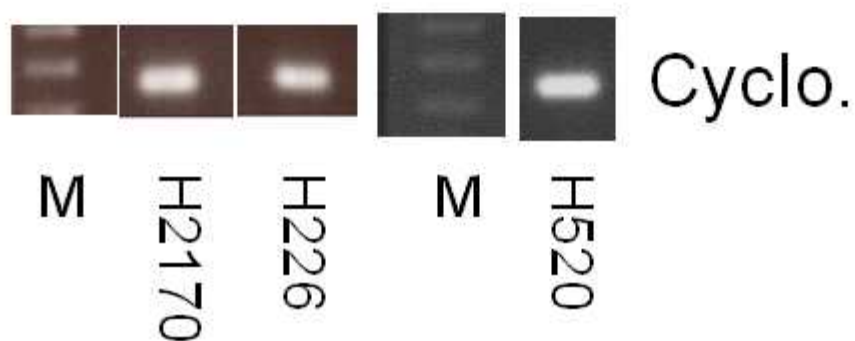

Supplement: MOESM4 [file 9469128]
